# Supplementary material for: Animal Management at the Ancient Metropolis of Teotihuacan, Mexico: Stable Isotope Analysis of Leporid (Cottontail and Jackrabbit) Bone Mineral
Source: PLoS One. 2016 Aug 17;11(8):e0159982. doi: 10.1371/journal.pone.0159982 (PMC4988673; doi:10.1371/journal.pone.0159982)
Supplement: S1 Table — Stable carbon isotope values have been corrected for the industrial (Suess) effect as detailed in the text. (XLSX) [file pone.0159982.s001.xlsx]

## Sheet: Sheet1
Supporting Information Table 1. Stable isotope data and contextual information for modern leporid specimens.
Stable carbon isotope values have been corrected for the industrial (Suess) effect.
Lab #	Cat #	Species	State	Location	Biome	Ecoregion	Elev (m)	Collection date (yrs AD)	δ13C apatite-VPDB (‰)	δ18O apatite-VSMOW (‰)
AS-0655	50078	Sylvilagus floridanus orizabae	Distrito Federal	Tlalpan	Tropical and Subtropical Coniferous Forests	Trans-Mexican Volcanic Belt pine-oak forests	2438	1892	-11.6518	26.6592
AS-0656	50079	Sylvilagus floridanus orizabae	Distrito Federal	Tlalpan	Tropical and Subtropical Coniferous Forests	Trans-Mexican Volcanic Belt pine-oak forests	2316	1892	-13.6421	24.5773
AS-0657	51111	Sylvilagus floridanus orizabae	Distrito Federal	Tlalpan	Tropical and Subtropical Coniferous Forests	Trans-Mexican Volcanic Belt pine-oak forests	2316	1892	-12.7979	24.6604
AS-0660	55592	Sylvilagus floridanus orizabae	Hidalgo	Tulancingo	Deserts and Xeric Shrublands	Meseta Central matorral	2393	1893	-8.35958	25.5268
AS-0661	55599	Sylvilagus floridanus orizabae	Hidalgo	Tulancingo	Deserts and Xeric Shrublands	Meseta Central matorral	2591	1893	-14.2855	23.4226
AS-0677	78468	Lepus californicus texianus	Queretaro	Tesquisquiapam	Deserts and Xeric Shrublands	Central Mexican Matorral	1981	1896	-10.2133	27.544
AS-0678	81463	Sylvilagus floridanus orizabae	Hidalgo	Zimapan	Tropical and Subtropical Coniferous Forests	Sierra Madre Oriental pine-oak forests	1890	1896	-11.8867	26.968
AS-0679	81528	Sylvilagus floridanus orizabae	Hidalgo	Zimapan	Tropical and Subtropical Coniferous Forests	Sierra Madre Oriental pine-oak forests	1890	1896	-10.8439	26.5303
AS-0705	540914	Sylvilagus floridanus orizabae	Puebla	San Baltazar Tetela	Tropical and Subtropical Coniferous Forests	Trans-Mexican Volcanic Belt pine-oak forests	2075	1966	-13.9579	26.1394
AS-0706	540914	Sylvilagus floridanus orizabae	Puebla	San Baltazar Tetela	Tropical and Subtropical Coniferous Forests	Trans-Mexican Volcanic Belt pine-oak forests	2075	1966	-12.8067	25.6412
AS-0707	540915	Sylvilagus floridanus orizabae	Puebla	San Baltazar Tetela	Tropical and Subtropical Coniferous Forests	Trans-Mexican Volcanic Belt pine-oak forests	2075	1966	-13.0449	27.937
AS-0708	540915	Sylvilagus floridanus orizabae	Puebla	San Baltazar Tetela	Tropical and Subtropical Coniferous Forests	Trans-Mexican Volcanic Belt pine-oak forests	2075	1966	-12.6585	28.2062
AS-0709	540916	Sylvilagus floridanus	Puebla	Malinche Volcano, S Slope	Tropical and Subtropical Coniferous Forests	Trans-Mexican Volcanic Belt pine-oak forests	3454	1966	-14.9155	25.3468
