# Supplementary material for: Animal Management at the Ancient Metropolis of Teotihuacan, Mexico: Stable Isotope Analysis of Leporid (Cottontail and Jackrabbit) Bone Mineral
Source: PLoS One. 2016 Aug 17;11(8):e0159982. doi: 10.1371/journal.pone.0159982 (PMC4988673; doi:10.1371/journal.pone.0159982)
Supplement: S2 Table — Data points highlighted in grey were excluded from analyses due to possible diagenesis or analytical error. (XLSX) [file pone.0159982.s002.xlsx]

## Sheet: Sheet1
Supporting Informatino Table 2. Provenience information, stable isotope results, and FTIR-ATR data for each archaeological specimen in the study.
Data points highlighted in grey were excluded from analyses due to possible diagenesis or analytical error.
AS Lab #	Spec or Tag #	Site	Unit/Project	Provenience/Location A	Provenience/Location B	Phase	Genus	Species	Element	Side	δ13C apatite-VPDB (‰)	δ18O apatite-VSMOW (‰)	C/P	IR-SF	Notes
AS-0315	A-1224.001	Moon Pyramid	Structure 2	Tunel	LII-LIII	Patlachique-Tlamimilolpa	Lepus		Femur	R	-9.11986	29.9288
AS-0321	A-1955.002	Moon Pyramid	Structure 1	Tunel 3	LXXIX, LXXX	Patlachique-Tlamimilolpa	Sylvilagus		Femur	R	-8.91012	29.194	0.295	2.80488
AS-0322	A-1985.002	Moon Pyramid	Structure 1	Tunel 3	LXXIX y LXXX	Patlachique-Tlamimilolpa	Sylvilagus		Tibia	L	-10.5801	27.3238	0.212121	3.03571
AS-0323	A-1592.001	Moon Pyramid	Structure 1	Tunel 3	LVI y LXXIX	Patlachique-Tlamimilolpa	Sylvilagus		Femur		-8.77442	24.8292	0.176991	3.06061
AS-0324	A-1917.001	Moon Pyramid	Structure 1	Tunel 3	LXXIX y LXXX	Patlachique-Tlamimilolpa	Lepus		Femur	L	-5.759	27.0986	0.147399	3.17188
AS-0325	A-1955.001	Moon Pyramid	Structure 1	Tunel 3	LXXIX, LXXX	Patlachique-Tlamimilolpa	Sylvilagus		Tibia		-8.90537	28.4745	0.203822	3.01695
AS-0326	A-1962.001	Moon Pyramid	Structure 1	Tunel 3	LXXIX, LXXX	Patlachique-Tlamimilolpa	Lepus		Femur	L	-6.3581	25.3638	0.145729	3.08621
AS-0327	A-1962.002	Moon Pyramid	Structure 1	Tunel 3	LXXIX, LXXX	Patlachique-Tlamimilolpa	Sylvilagus		Femur	R	-9.18729	26.1262	0.112861	3.09434
AS-0328	A-1962.003	Moon Pyramid	Structure 1	Tunel 3	LXXIX, LXXX	Patlachique-Tlamimilolpa	Sylvilagus		Femur	L	-9.86635	27.6326
AS-0329	A-1962.004	Moon Pyramid	Structure 1	Tunel 3	LXXIX, LXXX	Patlachique-Tlamimilolpa	Sylvilagus		Tibia	R	-10.3239	27.3208	0.196262	2.77551
AS-0330	A-1962.004	Moon Pyramid	Structure 1	Tunel 3	LXXIX, LXXX	Patlachique-Tlamimilolpa	Sylvilagus		Femur	R	-11.244	29.2461	0.251634	2.81132
AS-0331	A-1962.005	Moon Pyramid	Structure 1	Tunel 3	LXXIX, LXXX	Patlachique-Tlamimilolpa	Sylvilagus		Tibia	L	-7.78148	26.9087	0.133333	3.075
AS-0332	A-1962.006	Moon Pyramid	Structure 1	Tunel 3	LXXIX, LXXX	Patlachique-Tlamimilolpa	Sylvilagus		Humerus		-7.8025	28.2971	0.170604	2.82258
AS-0333	A-1985.001	Moon Pyramid	Structure 1	Tunel 3	LXXIX y LXXX	Patlachique-Tlamimilolpa	Sylvilagus		Femur		-6.35655	26.8403	0.154255	3.04762
AS-0334	A-2032.001	Moon Pyramid	Structure 1	Tunel 3	LXXX y LXXIX	Patlachique-Tlamimilolpa	Sylvilagus		Femur	L	-7.39604	27.4099	0.187943	2.85106
AS-0335	A-1819.001	Moon Pyramid	Structure 1	Tunel 3	LXXIX y LXXX	Patlachique-Tlamimilolpa	Sylvilagus		Scapula		-3.82514	11.8556	0.144737	3.5
AS-0336	A-2032.002	Moon Pyramid	Structure 1	Tunel 3	LXXX y LXXIX	Patlachique-Tlamimilolpa	Sylvilagus		radius		-8.65629	26.337	0.212644	2.96875
AS-0337	A-662.001	Moon Pyramid	Structure 2	Tunel	LI	Patlachique-Tlamimilolpa	Sylvilagus		Femur	L	-4.93236	24.7098	0.142433	3.08929
AS-0338	A-915.001	Moon Pyramid	Structure 2	Tunel	LII, LIII	Patlachique-Tlamimilolpa	Sylvilagus		Tibia	R	-6.23129	29.3113	0.245383	2.89286
AS-0339	A-915.002	Moon Pyramid	Structure 2	Tunel	LII, LIII	Patlachique-Tlamimilolpa	Sylvilagus		Femur	R	-5.13286	24.6395	0.203704	2.90909
AS-0340	A-940.001	Moon Pyramid	Structure 2	Tunel 1	LII, LIII	Patlachique-Tlamimilolpa	Sylvilagus		Femur	R	-6.75183	25.6038	0.0776256	3.22581
AS-0341	A-1290.001	Moon Pyramid	Structure 2	Tunel	LVI, LII, LIII (0-6)	Patlachique-Tlamimilolpa	Sylvilagus		Femur	L	-7.53814	23.7399	0.167391	2.88732
AS-0342	A-1296.001	Moon Pyramid	Structure 2	Tunel	LII, LIII, LVI	Patlachique-Tlamimilolpa	Sylvilagus		Mandible	L	-8.76929	25.3181	0.110092	3.24096
AS-0343	A-2178.001	Moon Pyramid	Structure 2	Tunel 4	LII y LIII	Patlachique-Tlamimilolpa	Sylvilagus		Mandible	L	-5.95743	28.4162	0.210084	2.84127
AS-0344	A-2366.001	Moon Pyramid	Structure 2	Tunel 4	LII, LIII	Patlachique-Tlamimilolpa	Lepus		Tibia		-12.2846	25.964	0.227964	2.81967
AS-0345	A2366.002	Moon Pyramid	Structure 2	Tunel 4	LII, LIII	Patlachique-Tlamimilolpa	Lepus		Humerus		-8.65386	24.4906	0.239316	2.65957
AS-0346	A-520.001	Moon Pyramid	Structure 3	Tunel	XIVa	Patlachique-Tlamimilolpa	Sylvilagus		Tibia	R	-10.0944	24.1681	0.145374	3.13187
AS-0347	A-3083.001	Moon Pyramid	Structure 4	Tunel 2	CXLIX	Patlachique-Tlamimilolpa	Lepus		Tibia	R	-14.6941	23.8224	0.199074	2.875
AS-0348	A-3083.002	Moon Pyramid	Structure 4	Tunel 2	CXLIX	Patlachique-Tlamimilolpa	Lepus		Femur	L	-4.71929	26.4117	0.229111	2.77273
AS-0349	A-6394.001	Moon Pyramid	Structure 4	Tunel 9	XLVIb y d, XXXI	Patlachique-Tlamimilolpa	Sylvilagus		Humerus		-11.0507	28.3819	0.247312	2.92045
AS-0350	A-6394.002	Moon Pyramid	Structure 4	Tunel 9	XLVIb y d, XXXI	Patlachique-Tlamimilolpa	Sylvilagus		Femur		-9.009	30.2168	0.207373	2.81081
AS-0351	A-382.001	Moon Pyramid	Structure 5	Tunel	XXVIII	Patlachique-Tlamimilolpa	Sylvilagus		Femur		-9.93486	24.156	0.105185	3.15714
AS-0352	A-382.002	Moon Pyramid	Structure 5	Tunel	XXVIII	Patlachique-Tlamimilolpa	Sylvilagus		Femur		-9.26629	26.8198	0.119734	3.15517
AS-0353	A-382.003	Moon Pyramid	Structure 5	Tunel	XXVIII	Patlachique-Tlamimilolpa	Sylvilagus		Tibia	R	-7.99757	23.6745	0.132898	2.98387
AS-0354	A-382.004	Moon Pyramid	Structure 5	Tunel	XXVIII	Patlachique-Tlamimilolpa	Lepus		Mandible	L	-10.7591	24.664	0.162162	3.30303
AS-0355	A-382.005	Moon Pyramid	Structure 5	Tunel	XXVIII	Patlachique-Tlamimilolpa	Lepus		Mandible	R	-10.9899	25.2612	0.181604	2.8871
AS-0356	A-5251.001	Moon Pyramid	Structure 5	Tunel	CCXLVIII	Patlachique-Tlamimilolpa	Sylvilagus		Tibia	R	-10.1457	28.2761	0.170404	2.95312
AS-0357	A-5279.001	Moon Pyramid	Structure 5	Tunel 2	CCXLVII	Patlachique-Tlamimilolpa	Lepus		Humerus		-5.06429	21.6129	0.162218	3.50794
AS-0358	H-024.002	Moon Pyramid	Structure 6	Pozo 1	IX	Patlachique-Tlamimilolpa	Lepus		Femur	L	-6.95957	23.9055	0.180723	2.89744
AS-0359	H-107.001	Moon Pyramid	Structure 6	Tunel 8 N1	IX y XIII	Patlachique-Tlamimilolpa	Lepus		Mandible	R	-11.8153	22.7572	0.165877	2.59302
AS-0360	H-182.001	Moon Pyramid	Structure 6	Tunel 8 E.2	IX	Patlachique-Tlamimilolpa	Sylvilagus		Femur	L	-9.12714	28.3758	0.160584	2.73437
AS-0361	H-182.002	Moon Pyramid	Structure 6	Tunel 8 E.2	IX	Patlachique-Tlamimilolpa	Sylvilagus		Tibia	L	-13.069	25.7794	0.189781	2.67273
AS-0362	H-305.001	Moon Pyramid	Structure 6	Tunel 8, Este 2	XXXVII, XXXVIII	Patlachique-Tlamimilolpa	Lepus		Femur	L	-4.74757	27.9209
AS-0363	H-316.001	Moon Pyramid	Structure 6	Tunel 8 E.2	XXXIX, XXXVIII	Patlachique-Tlamimilolpa	Lepus		Scapula	R	-4.74496	25.6982
AS-0364	H-336.001	Moon Pyramid	Structure 6	Tunel 8, Este 2	XXXVIII, XXXIX, XL, XLII	Patlachique-Tlamimilolpa	Sylvilagus		Femur	R	-6.90027	29.6997
AS-0365	H-856.001	Moon Pyramid	Structure 6	Tunel 8 E3	XCV, XCVI, XCVII	Patlachique-Tlamimilolpa	Sylvilagus		Humerus	L	-7.12611	25.8873
AS-0366	K-246.001	Moon Pyramid	Structure 4	Tunel 12	XXXII (muro 8)	Patlachique-Tlamimilolpa	Sylvilagus		Femur	R	-10.2549	24.1331
AS-0367	F-307.001	Moon Pyramid	Structure 6 or 7?	Tunel 7	XXXVII	Patlachique-Tlamimilolpa	Sylvilagus		Mandible	R	-10.8543	27.6486	0.0990338	3.15517
AS-0368	F307.002	Moon Pyramid	Structure 6 or 7?	Tunel 7	XXXVII	Patlachique-Tlamimilolpa	Lepus		Femur	R	-7.37843	22.5798	0.142433	3.21429
AS-0369	F-312.002	Moon Pyramid	Structure 7	Tunel 7	XXIX	Patlachique-Tlamimilolpa	Lepus		Femur	L	-10.521	22.5769	0.236364	5.63636
AS-0370	F-312.001	Moon Pyramid	Structure 7	Tunel 7	XXIX	Patlachique-Tlamimilolpa	Lepus		Pelvis	L	-6.10143	28.7696	0.342657	0.555556
AS-0371	K-317.001	Moon Pyramid	Structure 4	Tunel 12	XLI	Patlachique-Tlamimilolpa	Lepus		Tibia	R	-10.3153	24.7366	0.169329	2.67442
AS-0372	F-610.001	Moon Pyramid	Structure 7	Tunel 7	XXIX	Patlachique-Tlamimilolpa	Sylvilagus		Tibia	L	-12.84	25.5587	0.144086	4.17857
AS-0373	F-970.001	Moon Pyramid	Structure 6 or 7?	Tunel 7	LXIII	Patlachique-Tlamimilolpa	Sylvilagus		Pelvis	L	-11.3111	24.4485	0.141176	3.74286
AS-0455	H-913.001	Moon Pyramid	Structure 6	Tunel 8 N2	LXII, LXXXII, LXXXIII	Patlachique-Tlamimilolpa	Sylvilagus		Mandible				0.231975	2.93548
AS-0456	H-024.001	Moon Pyramid	Structure 6	Pozo 1	IX	Patlachique-Tlamimilolpa	Sylvilagus		dist Femur				0.262911	2.39474
AS-0068	OZT.012	Oztoyahualco	Cuarto 28	N324 E270 IIc	12177	Xolalpan	Sylvilagus	floridanus	Pelvis	L	-5.95014	24.2927	0.235714	2.0625	Se lavó para observar lasuperficie del hueso cubierto por una capa blanca posible de cal.
AS-0069	OZT.013	Oztoyahualco	-	N308 E281 E2C3 RIII	1251	Xolalpan	Sylvilagus		Tibia	L	-7.93943	21.7667	0.198225	2.22414	Marcas de roedor presentes. Se lavó para observar la superficie del hueso cubierto en una capa blanca posible de cal.
AS-0070	OZT.015	Oztoyahualco	Cuarto 28	N324 E270 IIc	12175	Xolalpan	Sylvilagus	cunicularius	Pelvis	L	-4.04529	20.8544	0.219653	2.30357
AS-0171	OZT.010	Oztoyahualco	Cuarto 10	N305 E273 E2C10		Xolalpan	Sylvilagus		Mandible	R
AS-0172	OZT.005	Oztoyahualco	Cuarto 28	N324 E270 IIc		Xolalpan	Lepus	floridanus	Mandible	L	-3.44151	24.6781	0.261745	2.83333	Se lavó para observar la superficie del hueso cubierto por una capa blanca posible de cal.
AS-0173	OZT.008	Oztoyahualco	Cuarto 10	N305 E273 E2C10		Xolalpan	Sylvilagus	cunicularius	?	L	-3.27034	27.2093	0.25817	2.72917
AS-0174	OZT.009	Oztoyahualco	Cuarto 10	N305 E273 E2C10		Xolalpan	Sylvilagus	cf. floridanus	Mandible	R	-6.40961	26.816	0.341772	2.5625
AS-0175	OZT.016	Oztoyahualco		N322 E268 R1 E2C2P R.T.928	12720	Xolalpan	Sylvilagus		Pelvis	R	-11.2622	24.9159	0.221557	3.08
AS-0176	OZT.011	Oztoyahualco	Cuarto 28	N324 E270 IIc	12177	Xolalpan	Lepus?	cunicularius	Tibia	L	-5.4427	24.7613	0.146751	3.18182	Se lavó para observar la superficie del hueso cubierto por una capa blanca, posible de cal.
AS-0177	OZT.014	Oztoyahualco	Cuarto 40	N315 E284 Id	1932	Xolalpan	Sylvilagus		Humero	R	-5.4502	24.6677	0.21164	2.84483	1 huella de carnívoro presente
AS-0260	OZT.017	Oztoyahualco	Cuarto 5?	N309 E275 RV E2 9C5, Posa Rt=177	2137	Xolalpan	Lepus	californicus	Femur	R	-4.68638	25.3704	0.248731	4.30189	Con una capa blanca posible de cal.
AS-0853	OZT.001	Oztoyahualco	Cuarto 10?	N305 E272 E2 C10		Xolalpan	Lepus	audobonii	Mandible	R	-5.47714	29.3568
AS-0854	OZT.002	Oztoyahualco	Cuarto 9	N310 E277 E2C9 RII		Xolalpan	Sylvilagus	floridanus	Femur	L	-4.16529	27.4221			3 huellas de carnívoro presente
AS-0855	OZT.003	Oztoyahualco	Cuarto 10	N306 E273 R1		Xolalpan	Sylvilagus		Tibia	R	-6.795	22.5457			No se observa si esta fusionado, pero parece que se quebró sobre la linea de fusionamiento.
AS-0856	OZT.004	Oztoyahualco	Cuarto 28	N324 E270 IIc		Xolalpan	Lepus		Femur	L	-6.09486	27.0033			Se lavó para observar la superficie del hueso cubierto por una capa blanca posible de cal.
AS-0857	OZT.006	Oztoyahualco	Cuarto 10?	N304 E275 E2C10		Xolalpan	Sylvilagus	cunicularius	Pelvis	R	-8.23386	27.0967
AS-0858	OZT.007	Oztoyahualco	Cuarto 5	N308 E276 E2C10 RI		Xolalpan	Sylvilagus		Humero	R	-4.83329	26.8306
AS-0814	25625	Puerta 5	Paso a nivel -Cala II	N6 E3	2	Coyotlatelco/Metepec	Sylvilagus	cunicularius	Pelvis	R	-5.40143	25.9659	0.228495	3.09804	Pelvis R de Sylvilagus cunicularius
AS-0815	25666	Puerta 5	Paso a nivel -Cala II	N5 E3	3	Coyotlatelco/Metepec	Sylvilagus		Mandible	R	-7.26114	22.8345	0.334928	3.18421	Dentario R de Mandible con pm2, pm3 and m1 de Sylvilagus sp. Bajo piso 3 - interior cuarto
AS-0816	25698	Puerta 5	Paso a nivel -Cala II	N2 W1	2	Coyotlatelco/Metepec	Sylvilagus	floridanus	Mandible	L	-4.95423	28.0879	0.328283	3.59259	Mandible L de Sylvilagus floridanus
AS-0817	25714	Puerta 5	Paso a nivel -Cala II	N1 W2	2	Coyotlatelco/Metepec	Sylvilagus		Pelvis	R	-8.80871	24.2966	0.340708	3.23529	Pelvis R de Sylvilagus sp.
AS-0818	26505	Puerta 5	Paso a nivel -Cala II	N1 W4	2	Coyotlatelco/Metepec	Sylvilagus		Femur	R	-12.8606	23.3455	0.289037	3.03704	Epífisis proximal de Femur R de Sylvilagus sp. - Epífisis fusionado
AS-0819	26542	Puerta 5	Paso a nivel -Cala II	N6 W1	2	Coyotlatelco/Metepec	Sylvilagus		Humerus	L	-6.84378	24.526	0.131746	3.32911	Mitad proximal de humero L de Sylvilagus sp. - Epífisis fusionado
AS-0820	26549	Puerta 5	Paso a nivel -Cala II	N7 E2	4	Coyotlatelco/Metepec	Sylvilagus		Humerus	L	-8.27368	26.6451	0.254181	3.18182	Humero L de juvenil Sylvilagus sp.
AS-0821	26612	Puerta 5	Paso a nivel -Cala II	N5 E1	2	Coyotlatelco/Metepec	Sylvilagus	cunicularius	Humerus	R	-8.17679	24.2406	0.161232	3.30556	Humero R de Sylvilagus cunicularius - Epífisis fusionado
AS-0822	26749	Puerta 5	Cueva III		4	Coyotlatelco/Metepec	Sylvilagus	floridanus	Femur	L	-5.70959	23.8896	0.133721	3.55556	Epífisis proximal de Femur L de Sylvilagus floridanus - Epífisis fusionado
AS-0823	27519	Puerta 5	Cueva III		5	Coyotlatelco/Metepec	Sylvilagus	floridanus	Mandible	R	-5.63688	22.9282	0.114362	3.69811	fragmento de Mandible R con 2 molares y 2 premolares de Sylvilagus floridanus
AS-0824	27521	Puerta 5	Cueva III		5	Coyotlatelco/Metepec	Sylvilagus	cunicularius	Pelvis	R	-10.3713	23.6938	0.188235	3.33333	Pelvis R de Sylvilagus cunicularius
AS-0825	27541	Puerta 5	Cueva III	N1 W1	4	Coyotlatelco/Metepec			Femur	R			0.12766	4.11628	Femur R de Leporidae (Lepus sp. o Sylvilagus cunicularius) - Epífisis fusionado
AS-0826	27541	Puerta 5	Cueva III	N1 W1	4	Coyotlatelco/Metepec			Femur	R			0.0690691	3.68919	Femur R de Leporidae (Lepus sp. o Sylvilagus cunicularius) - Epífisis fusionado
AS-0827	27541	Puerta 5	Cueva III	N1 W1	4	Coyotlatelco/Metepec	Sylvilagus	cunicularius	Femur	R	-6.87187	24.5537	0.0721805	4.15517	Mitad proximal de Femur R de Sylvilagus cunicularius
AS-0828	27541	Puerta 5	Cueva III	N1 W1	4	Coyotlatelco/Metepec	Sylvilagus	cunicularius	Femur	R	-4.8921	25.8662	0.138776	3.4697	Epífisis proximal de Femur R de Sylvilagus cf. cunicularius - Epífisis fusionado
AS-0829	28192	Puerta 5	Cueva III	N1 W2	6	Coyotlatelco/Metepec	Sylvilagus		Mandible	L	-4.98118	24.337	0.0960334	3.74138	Mandible L de Sylvilagus sp. - fragmento con m1, m2, m3 y 2 premolares
AS-0830	28197	Puerta 5	Cueva III	S1 W2	6	Coyotlatelco/Metepec	Sylvilagus		Maxilla		-4.82881	24.0119	0.0720961	3.63158	maxila con molares y premolares de Sylvilagus sp.
AS-0831	28199	Puerta 5	Cueva III	N2 W2	6	Coyotlatelco/Metepec	Sylvilagus	floridanus	Tibia	R	-6.80085	23.774	0.111328	3.80328	mitad proximal de Tibia R de Sylvilagus floridanus - porosidad y perdida de hueco (posiblemente osteomielitis) en epífisis proximal. - Epífisis fusionado
AS-0832	28200	Puerta 5	Cueva III	S1 W2	6	Coyotlatelco/Metepec	Sylvilagus	cunicularius	Mandible	R	-5.11559	23.5736	0.0891938	3.82258	Mandible R con incisivo roto de Sylvilagus cunicularius
AS-0833	28200	Puerta 5	Cueva III	S1 W2	6	Coyotlatelco/Metepec	Lepus		Tibia	L	-5.14731	27.1745	0.0793413	3.79167	epífisis distal de Tibia L de Lepus sp. - Epífisis fusionado
AS-0834	28200	Puerta 5	Cueva III	S1 W2	6	Coyotlatelco/Metepec	Sylvilagus		Humerus	L	-6.57225	26.466	0.113131	3.74138	epífisis distal de humero L de Sylvilagus sp. - Epífisis fusionado
AS-0835	29004	Puerta 5	Cueva III	N2 W1	6	Coyotlatelco/Metepec	Lepus		Tibia	L	-6.74797	26.0791	0.112766	3.90741	diáfisis de Tibia L de Lepus sp. con marcas de corte y marcas de roedor. Pulido (cocido?) - Epífisis fusionado
AS-0836	29914	Puerta 5	Cueva III	N2 E3	6	Coyotlatelco/Metepec	Lepus		Tibia	R	-5.58016	23.5043	0.147783	3.36508	Tibia R sin epífisis distal de Lepus sp. - Epífisis proximal fusionado
AS-0837	30431	Puerta 5	Cueva III	N1 W3	6	Coyotlatelco/Metepec	Sylvilagus	floridanus	Tibia	R	-7.31793	24.4068	0.366279	3.63333	Tibia R de Sylvilagus floridanus - Epífisis fusionado
AS-0838	35214	Puerta 5	Cueva III	N2 E2	4	Coyotlatelco/Metepec	Sylvilagus	audubonii	Femur	R	-6.99216	21.4503	0.138329	3.625	Femur R de Sylvilagus audubonii - Epífisis fusionado
AS-0839	35222	Puerta 5	Cueva III	S2 E6	4	Coyotlatelco/Metepec	Sylvilagus	floridanus	Tibia	L	-9.81801	24.0247	0.165548	3.40625	Tibia L de Sylvilagus floridanus - cocido. - Epífisis fusionado
AS-0840	35269	Puerta 5	Cueva III	S2 E7	4 y 5	Coyotlatelco/Metepec	Sylvilagus	cunicularius	Femur	R	-6.49442	25.513	0.134752	3.57971	Femur R de Sylvilagus cunicularius - Epífisis fusionado
AS-0841	35273	Puerta 5	Cueva III	N3 O1	4	Coyotlatelco/Metepec	Lepus		Femur	R			0.184143	3.40385	Femur R de Lepus sp. - Epífisis fusionado
AS-0842	27541	Puerta 5	Cueva III	N1 W1	4	Coyotlatelco/Metepec	Sylvilagus	cunicularius	Mandible	R+L			0.152778	3.60784	Mandible (L y R) de Sylvilagus cunicularius
AS-0178	43036	Teopancazco	TEOPAN 2000-2	E1 C158 R1	N466 E94	Tlamimilolpa - Xolalpan	Sylvilagus	floridanus	Mandible	L	-7.69601	26.9589	0.217054	2.92857
AS-0179	58208	Teopancazco	TEOPAN 2002	E1 C258C R1 Bajo Ap.2	N463 E95	Tlamimilolpa - Xolalpan	Sylvilagus	floridanus	Humerus	R	-7.01566	29.6071	0.398104	2.6087
AS-0180	3126	Teopancazco	TEOPAN 1997	E1 C17 AA6 R1 P3	N436 E82	Tlamimilolpa - Xolalpan	Sylvilagus	floridanus	Femur	L	-8.30706	28.556	0.402235	2.575
AS-0181	55878	Teopancazco	TEOPAN 2002	E1 C258C AA103 R1	N462 E93	Tlamimilolpa - Xolalpan	Sylvilagus	floridanus	Mandible	L	-6.06654	26.13	0.417178	2.96552
AS-0182	35127	Teopancazco	TEOPAN 2000-1	E1 C251 R1	N464 E116	Tlamimilolpa - Xolalpan	Sylvilagus	floridanus	Pelvis	R	-5.83185	28.3996	0.456522	2.64286
AS-0183	66717	Teopancazco	TEOPAN 2004	E1 C251A AA154 R1/A65	N462 E119	Tlamimilolpa - Xolalpan	Sylvilagus	floridanus	Mandible	L	-6.21277	23.6674	0.289256	2.60417
AS-0184	7786	Teopancazco	TEOPAN 1998-1	E1 C24 R1 Bajo Ap.6	N438 E87	Tlamimilolpa - Xolalpan	Sylvilagus	floridanus	Mandible	R	-6.25602	25.6948
AS-0185	55935	Teopancazco	TEOPAN 2002	E1 C258C AA103 R2	N463 E94	Tlamimilolpa - Xolalpan	Sylvilagus	floridanus	Pelvis	R	-6.43147	28.553
AS-0186	14206	Teopancazco	TEOPAN 1999-1	E1 C237B R1 Bajo Ap.12	N446 E82	Tlamimilolpa - Xolalpan	Sylvilagus	floridanus	Tibia	L	-7.30231	27.4323
AS-0187	51541	Teopancazco	TEOPAN 2001-2	E1 C213A R3	N452 E116	Tlamimilolpa - Xolalpan	Sylvilagus	floridanus	Humerus	L	-6.0946	29.3035
AS-0843	43320	Teopancazco	TEOPAN 2000-2	E1 C158 R2	N463 E94	Tlamimilolpa - Xolalpan	Sylvilagus	floridanus	Femur	L	-5.31757	28.0893	0.225694	3.95238
AS-0844	43375	Teopancazco	TEOPAN 2000-2	E1 C158 R3	N468 E93	Tlamimilolpa - Xolalpan	Lepus		Humerus	R	-6.26486	25.3819	0.143322	4.49057
AS-0845	43375	Teopancazco	TEOPAN 2000-2	E1 C158 R3	N468 E93	Tlamimilolpa - Xolalpan	Lepus		Femur	R	-9.11957	27.9574
AS-0846	44296	Teopancazco	TEOPAN 2000-2	E1 C158B AA77 EN23 R5 RT#7376	N465 E94	Tlamimilolpa - Xolalpan	Lepus		Tibia	R	-8.78271	27.2259
AS-0847	44373	Teopancazco	TEOPAN 2000-2	E1 C158 R5	N467 E93	Tlamimilolpa - Xolalpan	Lepus		Femur	L	-5.84686	25.8153
AS-0848	47376	Teopancazco	TEOPAN 2001-1	E1 C247B R2	N452 E118	Tlamimilolpa - Xolalpan	Lepus		Tibia	R	-3.78914	26.8958
AS-0849	51506	Teopancazco	TEOPAN 2001-2	E1 C213A R3	N453 E115	Tlamimilolpa - Xolalpan	Sylvilagus	floridanus	Femur	R	-9.541	26.4338
AS-0850	55878	Teopancazco	TEOPAN 2002	E1 C258C AA103 R1	N462 E93	Tlamimilolpa - Xolalpan	Sylvilagus	floridanus	Femur	L	-6.59314	28.8154
AS-0851	58982	Teopancazco	TEOPAN 2002	E1 C258E R4 Bajo Ap.2	N462 E95	Tlamimilolpa - Xolalpan	Sylvilagus	floridanus	Femur	R	-7.45	27.4543
AS-0852	55988	Teopancazco	TEOPAN 2002	E1 C258A AA103 R2	N463 E93	Tlamimilolpa - Xolalpan	Sylvilagus	floridanus	Femur	L	-8.17171	28.332
AS-0071	11912	Túneles y Cuevas	CV C2	N337 E102 1d-1f		Azteca	Lepus	californicus	Tibia	R	-9.19086	27.8414	0.275424	2.12195
AS-0072	11912	Túneles y Cuevas	CV C2	N337 E102 1d-1f		Azteca	Sylvilagus	floridanus	Femur	L	-8.03114	25.1372	0.262712	1.97727
AS-0073	21952	Túneles y Cuevas	CP C5	N349 E118 E8 Capa R2 (1d)		Azteca III	Sylvilagus	floridanus	Femur	L	-11.3137	21.3481	0.185792	2.05882
AS-0074	22715	Túneles y Cuevas	CP C5	N349 E116 1g		Azteca III	Lepus		Humerus	R	-6.97843	23.1094	0.276316	1.94444
AS-0075	22788	Túneles y Cuevas	CP C5	N350 E116 1g		Azteca III	Sylvilagus	floridanus	Femur	L	-8.61171	24.6808	0.25498	2.02222
AS-0164	22788	Túneles y Cuevas	CP C5	N350 E116 1g		Azteca III	Lepus		Pelvis	L	-7.73074	23.2102
AS-0165	23188	Túneles y Cuevas	CP C5	N348 E116 1h		Mazapa Perturbado por Azteca III	Sylvilagus	floridanus	Mandible	L	-8.13027	24.0928
AS-0166	24112	Túneles y Cuevas	CP C3	N347 E109 1g		Coyotlatelco	Sylvilagus	floridanus	Tibia	L	-12.6888	28.6185
AS-0167	25229	Túneles y Cuevas	CP C3	N346 E111 1f		Coyotlatelco	Lepus		Mandible	R	-7.10531	26.0875
AS-0168	22383	Túneles y Cuevas	CP C5	N349 E117 1f		Azteca III	Sylvilagus	floridanus	Femur	R	-8.96131	30.6275
AS-0169	11920	Túneles y Cuevas	CV C2	N336 E102 1d-1f		Azteca	Sylvilagus	floridanus	Tibia	L	-9.59699	26.4288
AS-0170	23402	Túneles y Cuevas	CP C4	N359-361 E125-126		Coyotlatelco tardio	Lepus		Tibia	R	-5.86337	27.7573
